# Supplementary material for: A novel microfluidic chip electrophoresis strategy for simultaneous, label-free, multi-protein detection based on a graphene energy transfer biosensor
Source: Royal Society of Chemistry journal article supplement (doi:10.1039/c3an02279j), 2014-01-01
Supplement: c3an02279j1.pdf [file c3an02279j1.pdf]

## Electronic Supplementary Information

# A Microfluidic Chip Electrophoresis Strategy for Simultaneous Label-free Multi-Protein Detection Based on Graphene Energy Transfer Biosensor

Fengming LIN<sup>a</sup>, Xiaochao ZHAO<sup>a</sup>, Jianshe WANG<sup>a</sup>, Shiyong YU<sup>a</sup>, Yulin DENG<sup>a</sup>, Lina GENG<sup>\*a</sup>, HuanJun LI<sup>\*</sup>

### Experimental evidence

#### 1. The AFM analysis of GO used in the experiment

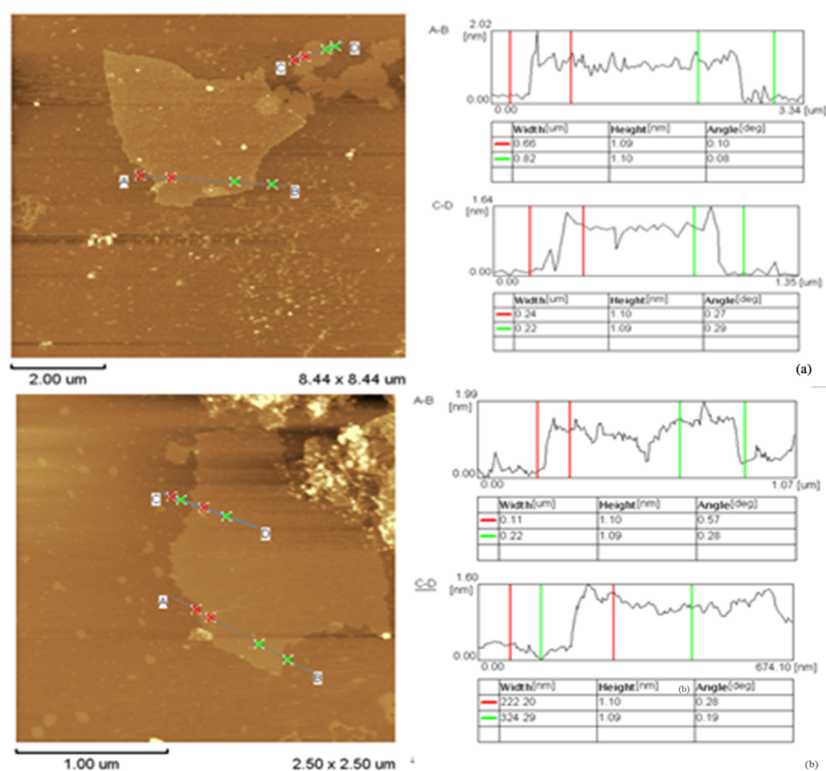

Figure 1 The AFM graph of different GO

## 2. The optimization of the ratio of GO and aptamer

The experiment was carried out by comparing different ratio of GO and aptamer in mixture (The concentration of GO is 0.3mg/mL, 2μM aptamer targeting thrombin, 10μM aptamer targeting cytochrome c and 10μM aptamer targeting lysozyme). The optimal ratio of GO and aptamer () was chosen with the high gray value of the fluorescent peaks in electropherograms.

| Ratio                            |          | 2:1:1:1 | 1:1:1:1 | 2:3:3:3 | 1:2:2:2 | 1:3:3:3 |
|----------------------------------|----------|---------|---------|---------|---------|---------|
| Gray value of peaks in CE graphy | thrombin | 0       | 10      | 25      | 38      | 40      |
|                                  | Cyto C   | 0       | 5       | 10      | 16      | 16      |
|                                  | lysozyme | 0       | 5       | 11      | 17      | 18      |

## 3. The separation result of simple protein mixture with 1D IEF chip electrophoresis

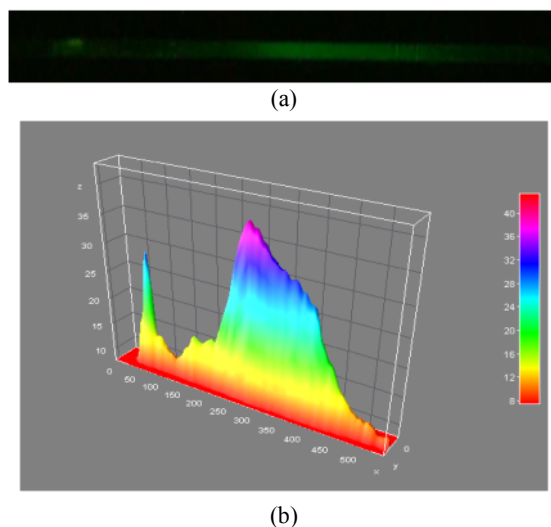

Figure 2. (a) Fluorescent separation images using IEF; (b) the 3D plot spectrum of (a).
